# Supplementary material for: Plant sterols and cholesterol metabolism are associated with five-year cognitive decline in the elderly population
Source: PubMed Central journal article supplement — iScience. 2023 Apr 24;26(6):106740. doi: 10.1016/j.isci.2023.106740 (PMC10209479; doi:10.1016/j.isci.2023.106740), 2023-04-24
Supplement: mmc1.pdf [file mmc1.pdf]

iScience, Volume 26

## **Supplemental information**

**Plant sterols and cholesterol metabolism are  
associated with five-year cognitive  
decline in the elderly population**

**Christopher Clark, Mehdi Gholam, Leonardo Zullo, Anja Kerksiek, Enrique  
Castelao, Armin von Gunten, Martin Preisig, Dieter Lütjohann, and Julius Popp**

|                                | Baseline |       | Five year follow-up |       | Change |
|--------------------------------|----------|-------|---------------------|-------|--------|
|                                | Mean     | SD    | Mean                | SD    |        |
| <b>Endogenous Sterols</b>      |          |       |                     |       |        |
| Cholesterol (mg/dL)            | 0.311    | 0.100 | 0.414               | 0.124 | ↑      |
| Lathosterol (mg/dL)            | 0.232    | 0.124 | 0.201               | 0.177 | ↓      |
| Lanosterol (µg/dL)             | 23.8     | 15.6  | 19.095              | 6.764 | ↓      |
| Desmosterol (mg/dL)            | 0.147    | 0.133 | 0.161               | 0.144 | ↑      |
| DihydroLanosterol (µg/dL)      | 3.867    | 3.26  | 0.395               | 0.304 | ↓      |
| 24S-hydroxycholesterol (ng/mL) | 55.8     | 17.1  | 70.0                | 20.5  | ↑      |
| 7α-hydroxycholesterol (ng/mL)  | 152.2    | 250.1 | 129.6               | 79.2  | ↓      |
| 27-hydroxycholesterol (ng/mL)  | 165.3    | 51.2  | 194.9               | 60.6  | ↑      |
| Cholesterol (µg/dL)            | 210.1    | 40.6  | 189.0               | 38.4  | ↓      |
| HDL-Cholesterol (mg/dL)        | 65.6     | 17.8  |                     |       |        |
| Triglycerides (mmol/L)         | 1.350    | 0.823 |                     |       |        |
| <b>Phytosterols</b>            |          |       |                     |       |        |
| Campesterol (mg/dL)            | 0.321    | 0.198 | 0.290               | 0.160 | ↓      |
| Campestanol (µg/dL)            | 6.03     | 4.13  | 3.94                | 1.43  | ↓      |
| Stigmasterol (µg/dL)           | 6.27     | 3.98  | 7.90                | 3.63  | ↑      |
| Sitosterol (mg/dL)             | 0.250    | 0.129 | 0.249               | 0.120 | =      |
| Sitostanol (µg/dL)             | 7.23     | 4.13  | 4.09                | 1.85  | ↓      |
| Brassicasterol (µg/dL)         | 19.4     | 10.9  | 20.7                | 10.7  | ↑      |

**Table S1:** Sterol plasma levels, related to Table 2. Mean baseline and five-year follow-up plasma levels of all cholesterol metabolism intermediates and phytosterols analysed in this study. Arrows indicate a significant increase or decrease in concentration of the designated metabolite at five-year follow up. SD, standard deviation.

|                           | Parsimonious model                                                    | Complete Model                                                        |
|---------------------------|-----------------------------------------------------------------------|-----------------------------------------------------------------------|
| <b>Endogenous sterols</b> |                                                                       |                                                                       |
| <b>CDR &gt; 0</b>         | Lathosterol 0.642<br>7α-hydroxycholesterol 1.329<br>Cholesterol 1.434 | Lathosterol 0.612<br>7α-hydroxycholesterol 1.313<br>Cholesterol 1.492 |
| <b>Phytosterols</b>       |                                                                       |                                                                       |
| <b>CDR &gt; 0</b>         | Stigmasterol 1.292<br>Sitosterol 0.475                                | Stigmasterol 1.308<br>Sitosterol 0.509                                |

**Table S2:** Associations of sterols with baseline cognition, related to Table 2. Binomial regression analysis of the association between baseline cognitive impairment (CDR > 0) and sterol clusters (cholesterol, oxysterol and phytosterols).

|                           | Parsimonious model                          | Complete Model                              |
|---------------------------|---------------------------------------------|---------------------------------------------|
| <b>Endogenous sterols</b> |                                             |                                             |
| <b>ΔMMSE</b>              | Desmosterol 0.076<br>HDL cholesterol 0.084  | Dihydrolanosterol -0.053                    |
| <b>ΔCDR-SoB</b>           | Dihydrolanosterol: -0.102<br>24S-OHC -0.119 | Dihydrolanosterol: -0.110<br>24S-OHC -0.113 |
| <b>Phytosterols</b>       |                                             |                                             |
| <b>ΔMMSE</b>              | Sitosterol* (-0.178)                        |                                             |
| <b>ΔCDR-SoB</b>           |                                             |                                             |

**Table S3:** Association of sterols with cognitive decline, related to Table 3. Linear regression analysis of the association between cognitive decline at five years measured using MMSE and CDR-SoB score changes and sterol clusters (cholesterol, endogenous sterols and phytosterols).

|                                          | No Statins<br>(n = 592) | Statins<br>(n = 92) | P-Value |
|------------------------------------------|-------------------------|---------------------|---------|
| Cholestanol mg/dL, mean (S.E)            | 0.418 (0.122)           | 0.379 (0.126)       | 0.002   |
| Lathosterol mg/dL, mean (S.E)            | 0.207 (0.193)           | 0.138 (0.095)       | < 0.001 |
| Lanosterol μg/dL, mean (S.E)             | 19,410 (6.586)          | 15.547 (6.623)      | < 0.001 |
| DihydroLanosterol μg/dL, mean (S.E)      | 0.402 (0.304)           | 0.273 (0.242)       | < 0.001 |
| 24S-hydroxycholesterol ng/mL, mean (S.E) | 71.054 (19.618)         | 62.072 (23.106)     | < 0.001 |
| 7α-hydroxycholesterol ng/mL, mean (S.E)  | 125.538 (76.420)        | 146.705 (85.769)    | 0.007   |
| 27-hydroxycholesterol ng/mL, mean (S.E)  | 197.515 (59.896)        | 170.146 (52.984)    | < 0.001 |
| Cholesterol μg/dL, mean (S.E)            | 191.025 (37.426)        | 168.574 (39.275)    | < 0.001 |

**Table S4:** Sterols and statins, related to Table 4. Five-year follow-up plasma levels of cholesterol metabolism intermediates affected by the intake of lipid-lowering medication (statins) at baseline.
